# Supplementary material
Source: PubMed Central journal article supplement (PMC5328639)
Supplement: NIHMS849262-supplement.pdf [file NIHMS849262-supplement.pdf]

## Supplementary tables:

Table S1:

|    | Nomenclature | Chr | Allele | Gene                     | AA  | AA position |
|----|--------------|-----|--------|--------------------------|-----|-------------|
| 1  | c.542G>A     | 1   | G/A    | ENSG00000132681 (ATP1A4) | R/Q | 181         |
| 2  | c.1150A>G    | 1   | T/C    | ENSG00000137992 (DBT)    | S/G | 384         |
| 3  | c.125G>A     | 1   | G/A    | ENSG00000213088 (DARC)   | G/D | 42          |
| 4  | c.1693T>C    | 1   | A/G    | ENSG00000134242 (PTPN22) | W/R | 565         |
| 5  | c.2009G>A    | 1   | G/A    | ENSG00000169174 (PCSK9)  | G/E | 670         |
| 6  | c.344G>A     | 1   | C/T    | ENSG00000143278 (F13B)   | R/H | 115         |
| 7  | c.1601A>G    | 1   | T/C    | ENSG00000198734 (F5)     | Q/R | 534         |
| 8  | c.7480T>C    | 1   | A/G    | ENSG00000066279 (ASPM)   | Y/H | 2494        |
| 9  | c.49A>G      | 2   | A/G    | ENSG00000163599 (CTLA4)  | T/A | 17          |
| 10 | c.380T>C     | 2   | A/G    | ENSG00000135899 (SP110)  | L/S | 127         |
| 11 | c.733G>A     | 2   | C/T    | ENSG00000170820 (FSHR)   | A/T | 245         |
| 12 | c.1853G>A    | 2   | C/T    | ENSG00000170820 (FSHR)   | S/N | 618         |
| 13 | c.3448T>C    | 2   | A/G    | ENSG00000169432 (SCN9A)  | W/R | 1150        |
| 14 | c.41C>G      | 3   | C/G    | ENSG00000173402 (DAG1)   | S/W | 14          |
| 15 | c.743T>C     | 3   | T/C    | ENSG00000145192 (AHSG)   | M/T | 248         |
| 16 | c.767G>C     | 3   | G/C    | ENSG00000145192 (AHSG)   | S/T | 256         |
| 17 | c.163A>G     | 4   | T/C    | ENSG00000145384 (FABP2)  | T/A | 55          |
| 18 | c.53C>A      | 4   | C/A    | ENSG00000154277 (UCHL1)  | S/Y | 18          |
| 19 | c.1805G>T    | 4   | C/A    | ENSG00000174125 (TLR1)   | S/I | 602         |
| 20 | c.3568G>A    | 5   | G/A    | ENSG00000095015 (MAP3K1) | A/T | 1190        |
| 21 | c.46G>A      | 5   | G/A    | ENSG00000169252 (ADRB2)  | G/R | 16          |
| 22 | c.79G>C      | 5   | G/C    | ENSG00000169252 (ADRB2)  | E/Q | 27          |
| 23 | c.412G>A     | 5   | G/A    | ENSG00000168685 (IL7R)   | V/I | 138         |
| 24 | c.197T>C     | 5   | T/C    | ENSG00000168685 (IL7R)   | I/T | 66          |

|    |            |   |     |                               |     |      |
|----|------------|---|-----|-------------------------------|-----|------|
| 25 | c.2893G>A  | 5 | C/T | ENSG00000138829 (FBN2)        | V/I | 965  |
| 26 | c.10411G>A | 5 | G/A | ENSG00000164199 (GPR98)       | E/K | 3471 |
| 27 | c.122C>A   | 5 | G/A | ENSG00000258864 (CTC-554D6.1) | A/E | 41   |
| 28 | c.5465T>A  | 5 | T/A | ENSG00000134982 (APC)         | V/D | 1822 |
| 29 | c.1630A>C  | 5 | A/C | ENSG00000112964 (GHR)         | I/L | 544  |
| 30 | c.989C>T   | 6 | G/A | ENSG00000204525 (HLA-C)       | A/V | 330  |
| 31 | c.982G>A   | 6 | C/T | ENSG00000204525 (HLA-C)       | V/I | 328  |
| 32 | c.925A>G   | 6 | T/C | ENSG00000204525 (HLA-C)       | M/V | 309  |
| 33 | c.302G>A   | 6 | C/T | ENSG00000234745 (HLA-B)       | S/N | 101  |
| 34 | c.47G>C    | 6 | C/G | ENSG00000204525 (HLA-C)       | G/A | 16   |
| 35 | c.11T>C    | 6 | A/G | ENSG00000234745 (HLA-B)       | M/T | 4    |
| 36 | c.1136T>C  | 6 | A/G | ENSG00000146070 (PLA2G7)      | V/A | 379  |
| 37 | c.1105A>G  | 6 | T/C | ENSG00000204525 (HLA-C)       | T/A | 369  |
| 38 | c.991A>G   | 6 | T/C | ENSG00000204525 (HLA-C)       | M/V | 331  |
| 39 | c.872A>C   | 6 | T/G | ENSG00000204525 (HLA-C)       | Q/P | 291  |
| 40 | c.41C>G    | 6 | G/C | ENSG00000234745 (HLA-B)       | S/W | 14   |
| 41 | c.44C>G    | 6 | G/C | ENSG00000234745 (HLA-B)       | A/G | 15   |
| 42 | c.49C>G    | 6 | G/C | ENSG00000234745 (HLA-B)       | L/V | 17   |
| 43 | c.292G>T   | 6 | C/A | ENSG00000234745 (HLA-B)       | D/Y | 98   |
| 44 | c.610G>C   | 6 | C/G | ENSG00000234745 (HLA-B)       | E/Q | 204  |
| 45 | c.363C>G   | 6 | G/C | ENSG00000234745 (HLA-B)       | S/R | 121  |
| 46 | c.355C>T   | 6 | G/A | ENSG00000234745 (HLA-B)       | L/F | 119  |
| 47 | c.5T>G     | 6 | A/C | ENSG00000234745 (HLA-B)       | L/R | 2    |
| 48 | c.560A>T   | 6 | T/A | ENSG00000234745 (HLA-B)       | E/V | 187  |
| 49 | c.22G>A    | 6 | C/T | ENSG00000204525 (HLA-C)       | A/T | 8    |
| 50 | c.559G>C   | 6 | C/G | ENSG00000234745 (HLA-B)       | E/Q | 187  |
| 51 | c.910C>G   | 6 | G/C | ENSG00000112619 (PRPH2)       | Q/E | 304  |
| 52 | c.206A>C   | 6 | T/G | ENSG00000234745 (HLA-B)       | E/A | 69   |
| 53 | c.929G>A   | 6 | C/T | ENSG00000112619 (PRPH2)       | R/K | 310  |

|    |           |    |     |                                  |     |      |
|----|-----------|----|-----|----------------------------------|-----|------|
| 54 | c.594G>T  | 6  | G/T | ENSG00000078401 (EDN1)           | K/N | 198  |
| 55 | c.829C>G  | 6  | G/C | ENSG000000204525 (HLA-C)         | Q/E | 277  |
| 56 | c.142T>G  | 6  | A/C | ENSG000000234745 (HLA-B)         | S/A | 48   |
| 57 | c.205G>A  | 6  | C/T | ENSG000000234745 (HLA-B)         | E/K | 69   |
| 58 | c.71C>T   | 7  | C/T | ENSG000000184408 (KCND2)         | S/L | 24   |
| 59 | c.553A>C  | 7  | T/G | ENSG000000188050 (RNF133)        | I/L | 185  |
| 60 | c.1642G>A | 7  | G/A | ENSG000000257743 (RP11-1220K2.2) | E/K | 548  |
| 61 | c.236T>C  | 7  | T/C | ENSG000000211746 (TRBV19)        | I/T | 79   |
| 62 | c.785C>T  | 7  | G/A | ENSG000000257138 (TAS2R38)       | A/V | 262  |
| 63 | c.894T>G  | 7  | T/G | ENSG000000164867 (NOS3)          | D/E | 298  |
| 64 | c.1388T>C | 7  | A/G | ENSG00000004948 (CALCR)          | L/P | 463  |
| 65 | c.1408C>T | 7  | G/A | ENSG000000122512 (PMS2)          | P/S | 470  |
| 66 | c.1739T>C | 7  | A/G | ENSG000000105929 (ATP6V0A4)      | M/T | 580  |
| 67 | c.2200T>G | 8  | T/G | ENSG00000042832 (TG)             | S/A | 734  |
| 68 | c.5995C>T | 8  | C/T | ENSG00000042832 (TG)             | R/W | 1999 |
| 69 | c.2564C>G | 9  | G/C | ENSG000000165271 (NOL6)          | A/G | 855  |
| 70 | c.494G>T  | 9  | G/T | ENSG000000137124 (ALDH1B1)       | G/V | 165  |
| 71 | c.1091G>A | 9  | C/T | ENSG000000095397 (DFNB31)        | R/H | 364  |
| 72 | c.6011C>G | 10 | C/G | ENSG000000107736 (CDH23)         | T/S | 2004 |
| 73 | c.244G>C  | 10 | G/C | ENSG000000107736 (CDH23)         | G/R | 82   |
| 74 | c.457T>C  | 10 | T/C | ENSG000000165730 (STOX1)         | Y/H | 153  |
| 75 | c.145A>G  | 10 | A/G | ENSG00000043591 (ADRB1)          | S/G | 49   |
| 76 | c.1165G>C | 10 | G/C | ENSG00000043591 (ADRB1)          | G/R | 389  |
| 77 | c.361C>T  | 11 | C/T | ENSG000000150455 (TIRAP)         | R/W | 121  |
| 78 | c.328A>C  | 11 | A/G | ENSG000000109861 (CTSC)          | I/L | 110  |
| 79 | c.775A>G  | 11 | T/C | ENSG000000172638 (EFEMP2)        | I/V | 259  |
| 80 | c.388C>T  | 12 | G/A | ENSG000000121318 (TAS2R10)       | P/S | 130  |
| 81 | c.242C>G  | 12 | G/C | ENSG000000197870 (PRB3)          | P/R | 81   |

|     |           |    |     |                            |     |      |
|-----|-----------|----|-----|----------------------------|-----|------|
| 82  | c.1751C>T | 12 | C/T | ENSG00000182326 (C1S)      | A/V | 584  |
| 83  | c.603G>T  | 13 | G/T | ENSG00000123171 (CCDC70)   | E/D | 201  |
| 84  | c.7397T>C | 13 | T/C | ENSG00000139618 (BRCA2)    | V/A | 2466 |
| 85  | c.1120T>G | 13 | A/C | ENSG00000123191 (ATP7B)    | S/A | 374  |
| 86  | c.1270G>C | 13 | C/G | ENSG00000123191 (ATP7B)    | V/L | 424  |
| 87  | c.2129T>C | 13 | A/G | ENSG00000123191 (ATP7B)    | V/A | 710  |
| 88  | c.1565G>A | 13 | C/T | ENSG00000123191 (ATP7B)    | R/K | 522  |
| 89  | c.2126G>A | 14 | G/A | ENSG00000100714 (MTHFD1)   | R/Q | 709  |
| 90  | c.259G>A  | 15 | C/T | ENSG00000159337 (PLA2G4D)  | V/I | 87   |
| 91  | c.1061T>C | 15 | T/C | ENSG00000140463 (BBS4)     | I/T | 354  |
| 92  | c.1331A>C | 16 | A/C | ENSG00000179588 (ZFPM1)    | E/A | 444  |
| 93  | c.538G>A  | 16 | C/T | ENSG00000121270 (ABCC11)   | G/R | 180  |
| 94  | c.1066A>G | 17 | T/C | ENSG00000108578 (BLMH)     | I/V | 356  |
| 95  | c.154G>T  | 17 | G/T | ENSG00000132518 (GUCY2D)   | A/S | 52   |
| 96  | c.188A>G  | 19 | T/C | ENSG00000131398 (KCNC3)    | D/G | 63   |
| 97  | c.7211G>C | 20 | C/G | ENSG00000130702 (LAMA5)    | R/P | 2404 |
| 98  | c.385A>G  | 20 | A/G | ENSG00000171867 (PRNP)     | M/V | 129  |
| 99  | c.2339A>C | 20 | T/G | ENSG00000075043 (KCNQ2)    | N/T | 780  |
| 100 | c.112A>G  | 21 | T/C | ENSG00000180509 (KCNE1)    | S/G | 38   |
| 101 | c.185A>G  | 22 | A/G | ENSG00000211647 (IGLV5-48) | E/G | 62   |
| 102 | c.226A>G  | 22 | A/G | ENSG00000211647 (IGLV5-48) | S/G | 76   |
| 103 | c.227G>A  | 22 | G/A | ENSG00000211647 (IGLV5-48) | S/N | 76   |
| 104 | c.1049A>G | 22 | T/C | ENSG00000100299 (ARSA)     | N/S | 350  |
| 105 | c.1172C>G | 22 | G/C | ENSG00000100299 (ARSA)     | T/S | 391  |
| 106 | c.466A>G  | X  | A/G | ENSG00000101981 (F9)       | T/A | 156  |
| 107 | c.97T>C   | X  | T/C | ENSG00000147100 (SLC16A2)  | S/P | 33   |

Table S2:

| ANTIGEN  | Controls (n=11) |      | IRAK4 <sup>-/-</sup> or MyD88 <sup>-/-</sup> (n=6) |      |                          | Patient (Tirap <sup>-/-</sup> ) |      |                          | Healthy Tirap <sup>-/-</sup> relatives (n=6) |      |                          |
|----------|-----------------|------|----------------------------------------------------|------|--------------------------|---------------------------------|------|--------------------------|----------------------------------------------|------|--------------------------|
|          | Mean            | SD   | Mean                                               | SD   | Difference from controls | Mean                            | SD   | Difference from controls | Mean                                         | SD   | Difference from controls |
| lukS     | 7858            | 4788 | 10201                                              | 4213 | ns                       | 16101                           | 1685 | **                       | 15158                                        | 4463 | *                        |
| fnbpB5   | 1603            | 2194 | 643                                                | 387  | ns                       | 2586                            | 1952 | ns                       | 1002                                         | 1339 | ns                       |
| CHIPS    | 13332           | 7139 | 18752                                              | 2287 | ns                       | 15310                           | 3108 | ns                       | 17858                                        | 2357 | ns                       |
| eapH2    | 8513            | 6242 | 17449                                              | 4792 | *                        | 15821                           | 5272 | ns                       | 12783                                        | 6814 | ns                       |
| clfBN2,3 | 7252            | 4927 | 7166                                               | 4749 | ns                       | 3198                            | 1055 | ns                       | 7484                                         | 3602 | ns                       |
| fnbpA1   | 3719            | 4580 | 2577                                               | 2803 | ns                       | 259                             | 219  | ns                       | 5206                                         | 3337 | ns                       |
| flip-R   | 6752            | 7105 | 7395                                               | 2962 | ns                       | 30.8                            | 41.3 | ns                       | 4300                                         | 2863 | ns                       |
| SEM      | 979             | 1617 | 1827                                               | 1274 | ns                       | 128                             | 132  | ns                       | 2606                                         | 2558 | ns                       |
| ETA      | 928             | 1560 | 3251                                               | 4680 | ns                       | 589                             | 919  | ns                       | 6189                                         | 6222 | ns                       |
| SEH      | 1666            | 2642 | 4729                                               | 6702 | ns                       | 120                             | 88.3 | ns                       | 1604                                         | 2893 | ns                       |
| sdrD     | 993             | 1515 | 2348                                               | 2668 | ns                       | 829                             | 270  | ns                       | 1183                                         | 623  | ns                       |
| fndpA2   | 625             | 673  | 2850                                               | 3697 | ns                       | 2468                            | 576  | ns                       | 4533                                         | 2618 | **                       |
| SCIN     | 6051            | 5072 | 9487                                               | 6094 | ns                       | 14700                           | 2490 | **                       | 10059                                        | 4400 | ns                       |
| TSST-1   | 5464            | 7542 | 11846                                              | 9159 | ns                       | 857                             | 1426 | ns                       | 12967                                        | 3838 | ns                       |
| fnbpA3   | 1771            | 2428 | 3706                                               | 3870 | ns                       | 850                             | 438  | ns                       | 4711                                         | 3087 | ns                       |
| hlgB     | 9996            | 4257 | 12800                                              | 2716 | ns                       | 11915                           | 2507 | ns                       | 13878                                        | 2583 | ns                       |
| Nuc      | 4187            | 4733 | 12337                                              | 6345 | ns                       | 14860                           | 3065 | *                        | 10325                                        | 8195 | ns                       |
| fnbpA5   | 1095            | 1540 | 3063                                               | 3626 | ns                       | 2579                            | 2280 | ns                       | 2592                                         | 2670 | ns                       |
| SEB      | 2315            | 3328 | 3566                                               | 3790 | ns                       | 11940                           | 9488 | *                        | 11248                                        | 8091 | ns                       |
| SEA      | 2333            | 2946 | 7571                                               | 6999 | ns                       | 6581                            | 3120 | ns                       | 12030                                        | 4061 | ***                      |
| lukE     | 11775           | 6025 | 15911                                              | 4041 | ns                       | 12915                           | 2182 | ns                       | 17219                                        | 3311 | ns                       |
| lukD     | 10921           | 5598 | 11314                                              | 3694 | ns                       | 9710                            | 1359 | ns                       | 14191                                        | 3657 | ns                       |
| eap      | 6709            | 3166 | 14967                                              | 2424 | ***                      | 13178                           | 2035 | ***                      | 13154                                        | 1843 | ***                      |
| clfAN2,3 | 2260            | 2512 | 3886                                               | 5438 | ns                       | 8120                            | 4415 | *                        | 5536                                         | 2257 | ns                       |
| A-tox    | 8050            | 5053 | 13513                                              | 5196 | ns                       | 13210                           | 2040 | ns                       | 13791                                        | 4941 | ns                       |
| ssl-1    | 5833            | 5231 | 11074                                              | 8742 | ns                       | 1980                            | 1616 | ns                       | 9521                                         | 5242 | ns                       |
| sasH     | 406             | 516  | 415                                                | 584  | ns                       | 213                             | 138  | ns                       | 269                                          | 338  | ns                       |
| ssl-3    | 9652            | 6770 | 12954                                              | 3787 | ns                       | 6048                            | 4741 | ns                       | 14085                                        | 3514 | ns                       |
| ssl-5    | 3274            | 2055 | 4918                                               | 2768 | ns                       | 2344                            | 1132 | ns                       | 4184                                         | 1800 | ns                       |
| ssl-9    | 10101           | 5194 | 15332                                              | 2994 | ns                       | 9048                            | 4923 | ns                       | 14444                                        | 5669 | ns                       |
| fnbpA6   | 561             | 432  | 1458                                               | 2632 | ns                       | 134                             | 47.8 | ns                       | 1024                                         | 629  | ns                       |
| ssl-10   | 6309            | 4233 | 8170                                               | 3254 | ns                       | 2594                            | 1361 | ns                       | 7962                                         | 1364 | ns                       |
| ssl-11   | 1589            | 1999 | 1792                                               | 2021 | ns                       | 85.7                            | 79.7 | ns                       | 1125                                         | 1401 | ns                       |
| sec      | 7475            | 8773 | 14402                                              | 6989 | ns                       | 9714                            | 7676 | ns                       | 15402                                        | 4819 | ns                       |
| etb      | 182             | 246  | 2672                                               | 5129 | ns                       | 79                              | 60.7 | ns                       | 454                                          | 745  | ns                       |
| seo      | 608             | 720  | 2156                                               | 1622 | *                        | 338                             | 266  | ns                       | 1246                                         | 536  | ns                       |
| fnbpB    | 562             | 847  | 285                                                | 255  | ns                       | 2300                            | 1506 | **                       | 946                                          | 948  | ns                       |
| fnbpB1   | 699             | 1123 | 472                                                | 531  | ns                       | 158                             | 85.2 | ns                       | 372                                          | 310  | ns                       |
| isdA     | 14551           | 4645 | 17305                                              | 2466 | ns                       | 18029                           | 1641 | ns                       | 13815                                        | 8321 | ns                       |

|         |       |      |       |      |    |       |      |    |       |      |     |
|---------|-------|------|-------|------|----|-------|------|----|-------|------|-----|
| fnbpB2  | 2021  | 1901 | 2132  | 1722 | ns | 3835  | 1315 | ns | 4857  | 2757 | ns  |
| fnbpB4  | 1504  | 2328 | 1809  | 2445 | ns | 543   | 239  | ns | 1235  | 1139 | ns  |
| fnbpB6  | 438   | 596  | 704   | 477  | ns | 167   | 54.4 | ns | 1089  | 1081 | ns  |
| fnbpB7  | 1448  | 2504 | 1716  | 2539 | ns | 440   | 177  | ns | 1194  | 1273 | ns  |
| fnbpA7  | 741   | 832  | 1542  | 2410 | ns | 483   | 721  | ns | 1367  | 1279 | ns  |
| sasC    | 154   | 124  | 329   | 416  | ns | 140   | 74.7 | ns | 310   | 181  | ns  |
| flipR-L | 5760  | 5261 | 9998  | 4771 | ns | 97    | 72.4 | ns | 4849  | 3099 | ns  |
| esxB    | 259   | 299  | 247   | 225  | ns | 148   | 191  | ns | 159   | 147  | ns  |
| prsA    | 621   | 908  | 2336  | 2516 | ns | 2727  | 3676 | ns | 572   | 308  | ns  |
| atl2    | 7643  | 4486 | 14766 | 3511 | *  | 17075 | 4651 | ** | 14688 | 3973 | *   |
| lipase  | 11684 | 7289 | 17179 | 3296 | ns | 4671  | 3633 | ns | 10058 | 6773 | ns  |
| sed     | 1528  | 2142 | 1757  | 684  | ns | 703   | 276  | ns | 516   | 308  | ns  |
| fnbpA   | 2609  | 3450 | 3057  | 4941 | ns | 849   | 863  | ns | 2685  | 1722 | ns  |
| sdrE    | 1541  | 1876 | 2450  | 2785 | ns | 1008  | 507  | ns | 2158  | 1399 | ns  |
| SEE     | 253   | 620  | 3777  | 4716 | ns | 2646  | 1587 | ns | 5403  | 2913 | **  |
| SEJ     | 2491  | 3455 | 5448  | 1919 | ns | 1825  | 868  | ns | 2573  | 1698 | ns  |
| isdH    | 695   | 920  | 796   | 623  | ns | 911   | 349  | ns | 740   | 728  | ns  |
| sasG    | 850   | 1456 | 777   | 1042 | ns | 177   | 159  | ns | 1608  | 1932 | ns  |
| sdrC    | 1478  | 1642 | 3970  | 3871 | ns | 897   | 835  | ns | 4118  | 3403 | ns  |
| SEI     | 511   | 669  | 1499  | 1007 | ns | 298   | 145  | ns | 3369  | 3106 | **  |
| SEQ     | 745   | 1709 | 1484  | 1646 | ns | 74.7  | 41.6 | ns | 2098  | 1742 | ns  |
| isaA    | 7943  | 5917 | 17129 | 6758 | *  | 2210  | 1136 | ns | 6631  | 4743 | ns  |
| lyt M   | 1678  | 2595 | 8325  | 6795 | ** | 900   | 631  | ns | 2280  | 1613 | ns  |
| SER     | 312   | 573  | 725   | 832  | ns | 132   | 136  | ns | 1274  | 1705 | ns  |
| Aly     | 1391  | 1447 | 3361  | 1938 | ns | 3427  | 1824 | ns | 2198  | 1016 | ns  |
| pro Atl | 1361  | 2225 | 4501  | 6461 | ns | 6402  | 3651 | ns | 3597  | 1229 | ns  |
| SEG     | 493   | 596  | 1733  | 1107 | ns | 303   | 322  | ns | 3606  | 2476 | *** |
| eapH1   | 827   | 1128 | 2255  | 2254 | ns | 1471  | 1009 | ns | 1204  | 1083 | ns  |
| SA2097  | 4.02  | 6.71 | 15.6  | 14.9 | ns | 25.6  | 18.8 | *  | 8.42  | 8.23 | ns  |

**Table S3 :**

|                                             | P1 (III.1)  | II.5        | I.1         |
|---------------------------------------------|-------------|-------------|-------------|
| Single/Paired-end                           | Paired-end  | Paired-end  | Paired-end  |
| Bait-set                                    | 50 Mb       | 50 Mb       | 71 Mb       |
| Total reads                                 | 164,759,220 | 184,566,394 | 132,090,076 |
| Total reads aligned in the targeted regions | 22,485,016  | 26,512,246  | 75,999,552  |
| Mean coverage                               | 44.97       | 53.02       | 107.04      |
| Target bases covered by > 2X                | 99.4        | 99.6        | 99.7        |
| Target bases covered by > 10X               | 92.3        | 94.6        | 98.5        |
| Target bases covered by > 20X               | 75.8        | 81.5        | 95.2        |
| Target bases covered by > 30X               | 58.4        | 66.1        | 90          |
